# Supplementary material for: MetGEMs Toolbox: Metagenome-scale models as integrative toolbox for uncovering metabolic functions and routes of human gut microbiome
Source: PLoS Comput Biol. 2021 Jan 6;17(1):e1008487. doi: 10.1371/journal.pcbi.1008487 (PMC7787440; doi:10.1371/journal.pcbi.1008487)
Supplement: S3 Spreadsheet — (XLSX) [file pcbi.1008487.s007.xlsx]

## Sheet: HMP samples use
S3 Spreadsheet. List of HMP Sample IDs
HMP Sample IDs	Run	Sex
SRS017821	SRR041310	male
SRS017701	SRR040913	female
SRS018133	SRR040925	male
SRS058770	SRR040853	male
SRS011529	SRR044912	male
SRS020233	SRR041135	male
SRS051031	SRR046376	male
SRS014923	SRR045709	male
SRS015578	SRR043983	male
SRS016203	SRR044423	female
SRS011271	SRR044974	male
SRS018427	SRR041118	male
SRS020869	SRR041542	male
SRS011452	SRR045327	male
SRS024388	SRR041171	female
SRS015190	SRR047400	female
SRS015133	SRR045722	female
SRS017307	SRR040886	male
SRS019582	SRR047363	male
SRS016018	SRR044251	male
SRS014613	SRR045715	female
SRS015663	SRR044257	male
SRS016267	SRR044091	male
SRS023914	SRR041629	male
SRS015782	SRR044216	male
SRS049164	SRR049604	male
SRS022609	SRR041852	male
SRS017521	SRR041050	female
SRS024331	SRR041132	male
SRS018817	SRR046200	male
SRS017103	SRR041032	male
SRS011586	SRR045344	female
SRS019910	SRR044428	male
SRS016056	SRR044252	male
SRS021484	SRR041529	male
SRS062427	SRR046888	male
SRS017191	SRR041435	male
SRS015960	SRR044119	male
SRS016095	SRR044395	female
SRS049959	SRR046215	male
SRS019787	SRR043980	male
SRS054590	SRR046698	female
SRS024625	SRR041243	male
SRS064276	SRR046311	female
SRS011405	SRR044948	female
SRS018313	SRR041495	male
SRS024265	SRR042014	female
SRS052697	SRR049639	female
SRS016954	SRR041333	male
SRS013687	SRR041527	male
SRS063985	SRR046830	female
SRS016335	SRR044424	male
SRS019267	SRR044439	female
SRS048870	SRR044103	female
SRS064557	SRR046745	female
SRS053335	SRR046056	female
SRS014235	SRR049364	male
SRS015854	SRR043760	male
SRS014287	SRR045506	male
SRS050422	SRR045544	male
SRS019685	SRR046224	male
